# Supplementary material
Source: PubMed Central journal article supplement (PMC8103451)
Supplement: tpmd201481.SD1.pdf [file tpmd201481.SD1.pdf]

The following are supplemental materials and will be published online only

**Supplemental Table S1.** WHO recommendations for classifying outcomes in order to calculate the cumulative success or the proportion of adequate clinical and parasitological response on PCR-corrected results for recurrent parasitemia on or after day 7 (adapted from <sup>3</sup>).

|                                                       | Kaplan-Meier analysis                                                                     | Per-protocol analysis  |
|-------------------------------------------------------|-------------------------------------------------------------------------------------------|------------------------|
| <i>P. falciparum</i> recrudescence                    | Failure                                                                                   | Failure                |
| <i>P. falciparum</i> reinfection                      | Censored day of new infection                                                             | Excluded from analysis |
| Other species with <i>P. falciparum</i> recrudescence | Failure                                                                                   | Failure                |
| Other species with <i>P. falciparum</i> new infection | Censored day of new infection                                                             | Excluded from analysis |
| Other species infection                               | Censored day of infection                                                                 | Excluded from analysis |
| Undetermined or missing PCR                           | Excluded from PCR-corrected analysis (included as a failure for PCR-uncorrected analysis) | Excluded from analysis |
| Loss to follow-up                                     | Censored last day of follow-up                                                            | Excluded from analysis |
| Withdrawal and protocol violation                     | Censored last day of follow-up before withdrawal or protocol violation                    | Excluded from analysis |
