# Supplementary material
Source: PubMed Central journal article supplement (PMC8103451)
Supplement: tpmd201481.SD2.pdf [file tpmd201481.SD2.pdf]

**Supplemental Table S2.** Characteristics of molecular analysis reported by published therapeutic efficacy reports on artemisinin-based combination therapy from Sub-Saharan Africa, stratifying by time period

|                                                                         | pre-2008 |     |     | 2008 and after |     |     |
|-------------------------------------------------------------------------|----------|-----|-----|----------------|-----|-----|
|                                                                         | n        | N   | %   | n              | N   | %   |
| Study explicitly states how samples with multiple alleles were analyzed | 51       | 103 | 50% | 46             | 129 | 36% |
| Consistent with WHO methodology                                         | 37       | 51  | 73% | 37             | 46  | 80% |
| Inconsistent with WHO methodology                                       | 11       | 51  | 22% | 3              | 46  | 7%  |
| Unclear                                                                 | 3        | 51  | 6%  | 6              | 46  | 13% |

WHO: World Health Organization

The following are supplemental materials and will be published online only
