# Supplementary material
Source: PubMed Central journal article supplement (PMC8103451)
Supplement: tpmd201481.SD3.pdf [file tpmd201481.SD3.pdf]

The following are supplemental materials and will be published online only

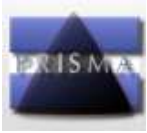

## Supplemental Figure S1: PRISMA 2009 Flow Diagram

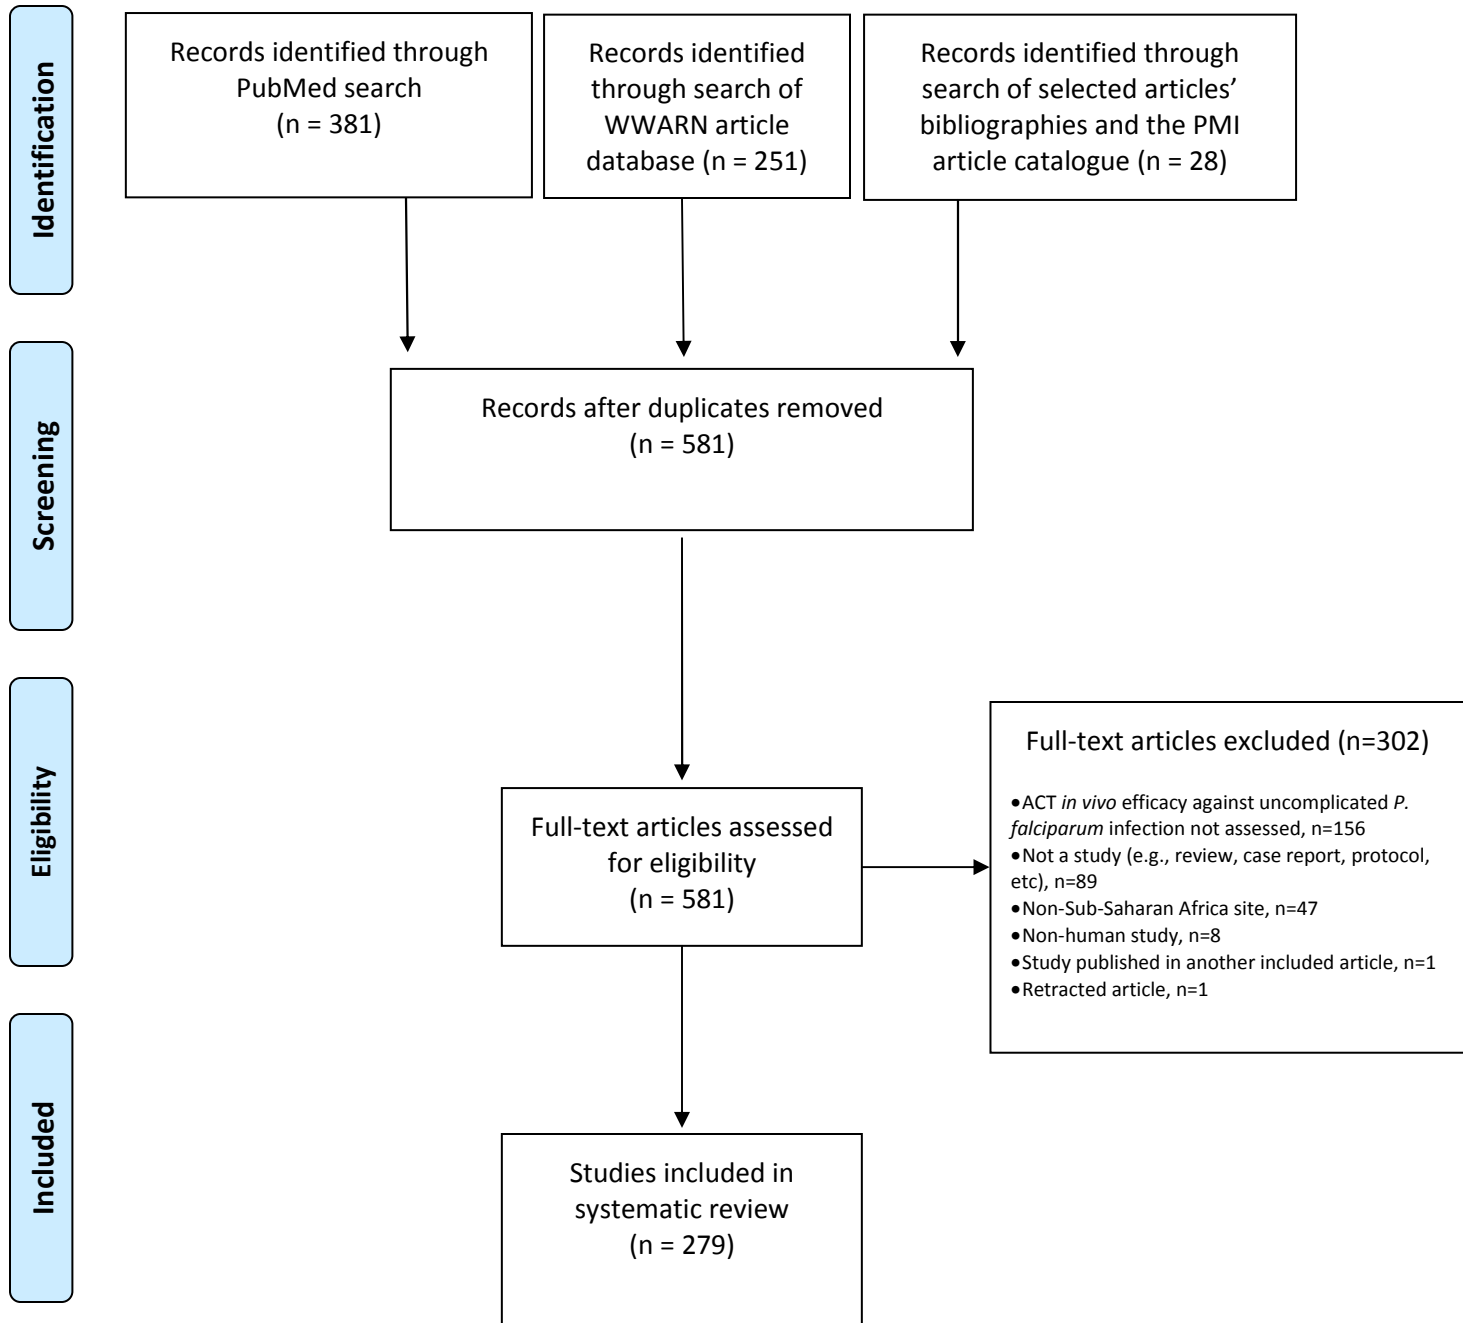

From: Moher D, Liberati A, Tetzlaff J, Altman DG, The PRISMA Group (2009). Preferred Reporting Items for Systematic Reviews and Meta-Analyses: The PRISMA Statement. PLoS Med 6(7): e1000097. doi:10.1371/journal.pmed1000097

For more information, visit [www.prisma-statement.org](http://www.prisma-statement.org).
