# Supplementary material
Source: PubMed Central journal article supplement (PMC8103451)
Supplement: tpmd201481.SD4.pdf [file tpmd201481.SD4.pdf]

a. Total subjects = lost to follow-up + withdrawn + early treatment failures + new infections + recrudescences + ACPR

b. Total subjects reaching an endpoint = early treatment failures + new infections + recrudescences + ACPR

c. Uncorrected efficacy = 
$$\frac{\text{ACPR}}{\text{early treatment failures} + \text{new infections} + \text{recrudescences} + \text{ACPR}}$$

d. PCR-corrected efficacy (per WHO methodology) = 
$$\frac{\text{ACPR}}{\text{early treatment failures} + \text{recrudescences} + \text{ACPR}}$$

e. PCR-corrected efficacy (not per WHO methodology) = 
$$\frac{\text{ACPR} + \text{new infections}}{\text{early treatment failures} + \text{new infections} + \text{recrudescences} + \text{ACPR}}$$

a. Total subjects = 8 + 2 + 1 + 35 + 7 + 57 = 110

b. Total subjects reaching an endpoint = 1 + 35 + 7 + 57 = 100

c. Uncorrected efficacy = 
$$\frac{57}{1+35+7+57} = 57\%$$

d. PCR-corrected efficacy (per WHO methodology) = 
$$\frac{57}{1+7+57} = 88\%$$

e. PCR-corrected efficacy (not per WHO methodology) = 
$$\frac{57+35}{1+35+7+57} = 92\%$$
